# Supplementary material for: Modeling and evaluation of the susceptibility to landslide events using machine learning algorithms in the province of Chañaral, Atacama region, Chile
Source: Copernicus journal article supplement (doi:10.5194/nhess-2023-72), 2023-06-23

remociones

classif.ce

classif.ksvm

classif.log\_reg

classif.ranger

classif.xgboost

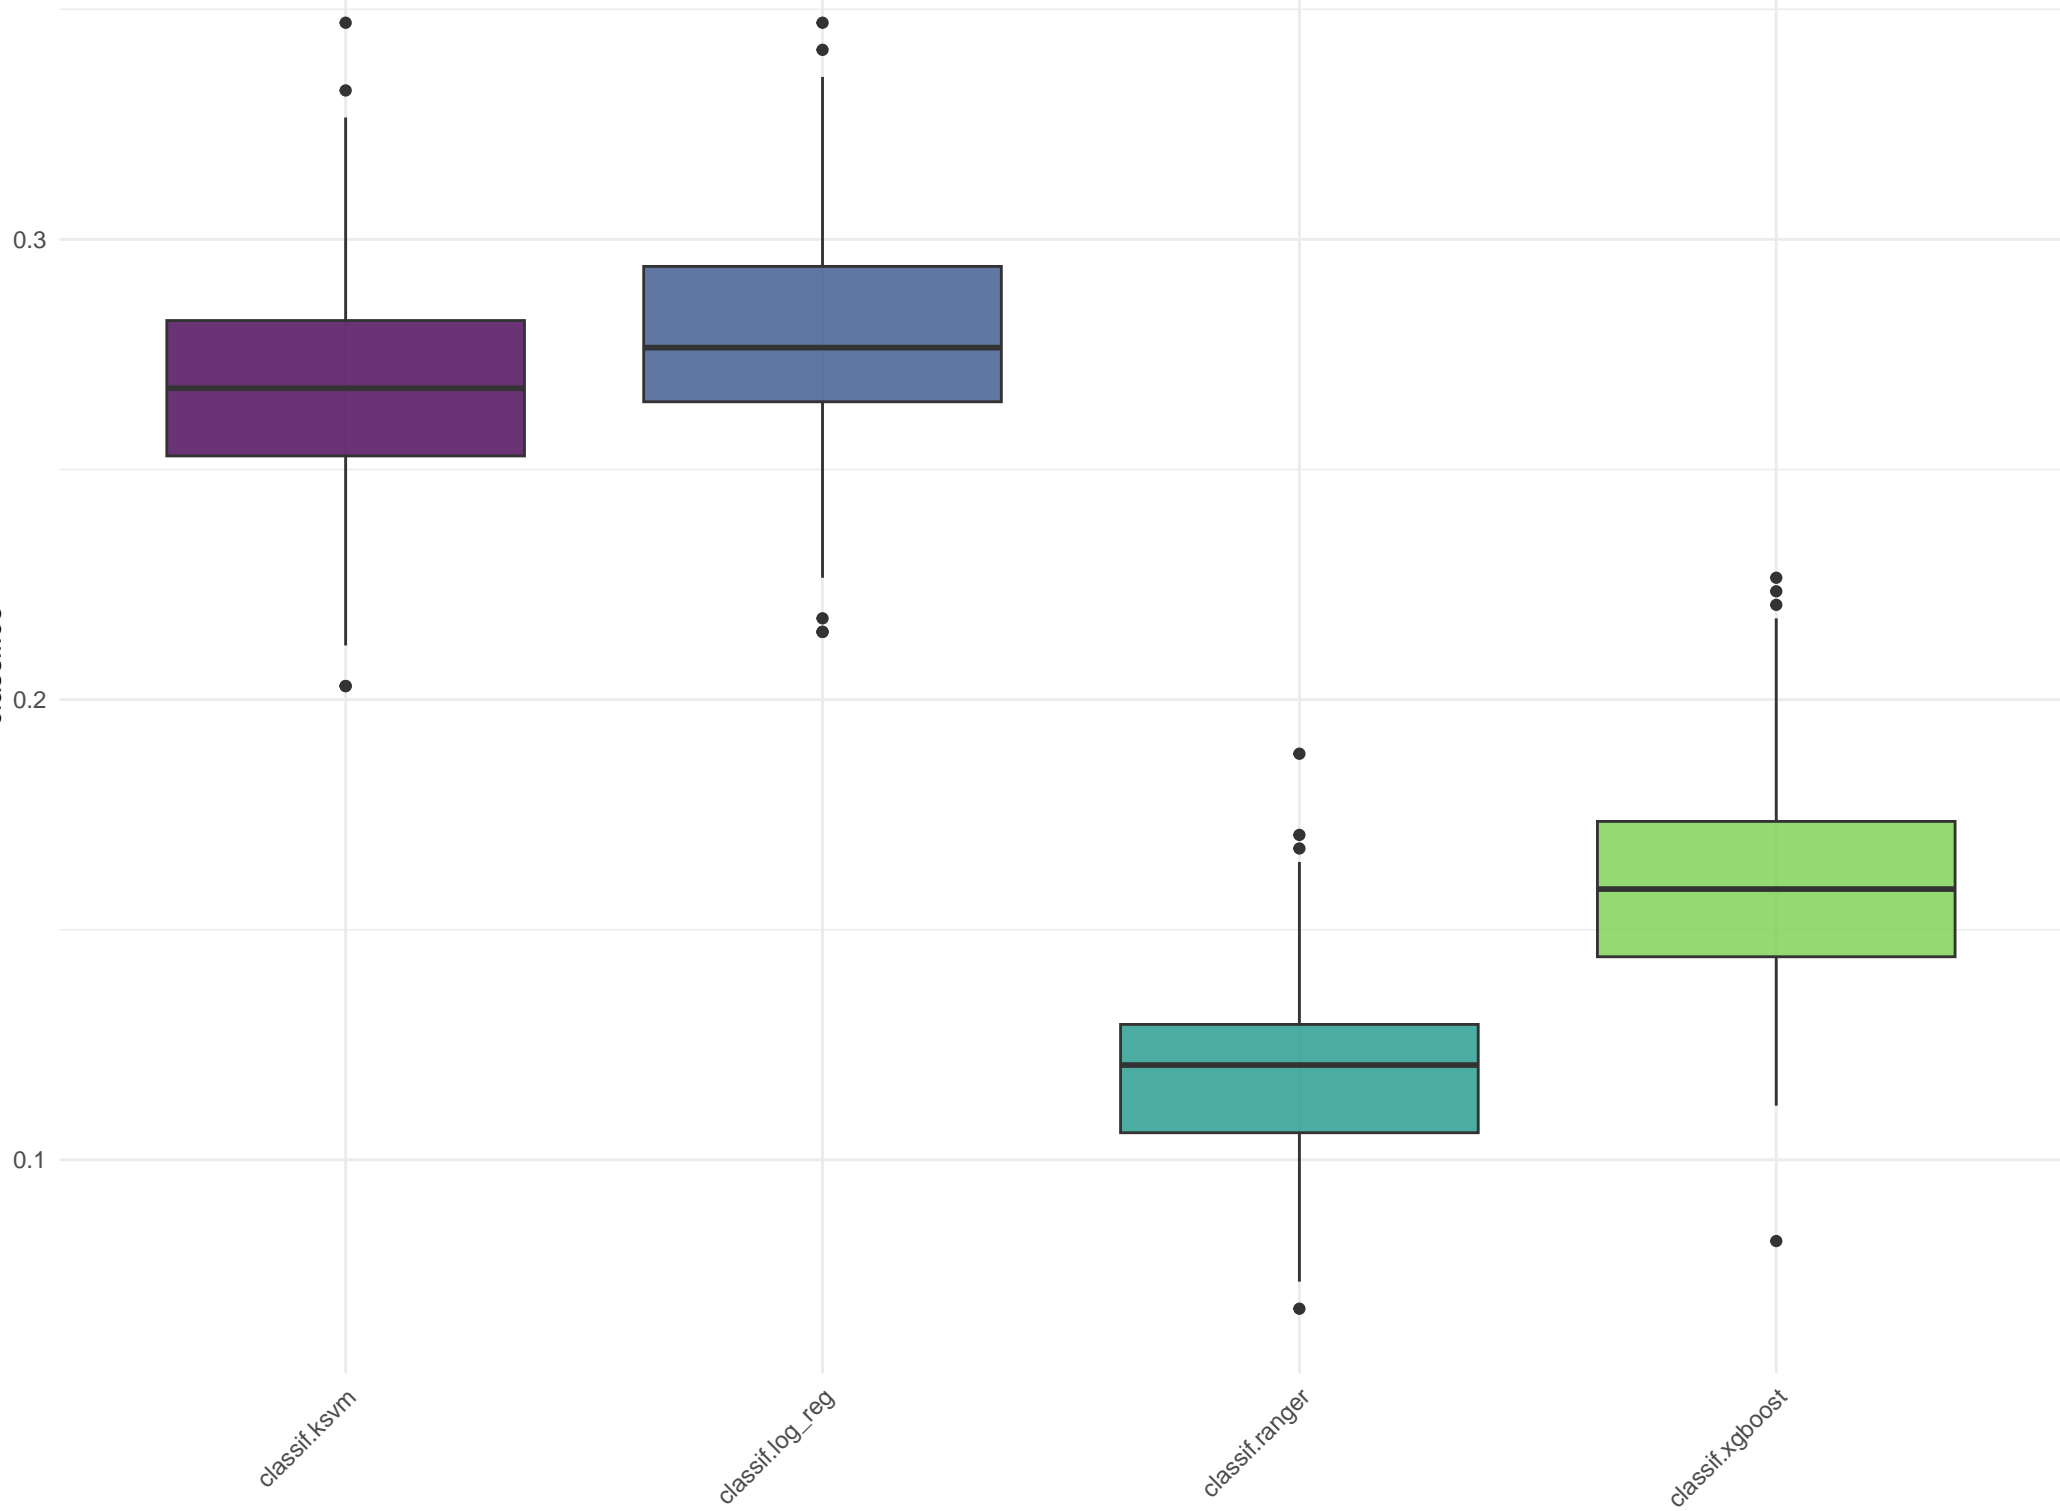

Supplement: Supplementary file [file nhess-2023-72-AC2-supplement.zip]
