# Supplementary material for: Modeling and evaluation of the susceptibility to landslide events using machine learning algorithms in the province of Chañaral, Atacama region, Chile
Source: Copernicus journal article supplement (doi:10.5194/nhess-2023-72), 2023-06-23

350000

400000

450000

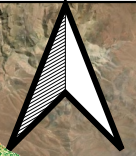

7100284

7050282

Random Forest

-  Very low susceptibility
-  Low susceptibility
-  Middle susceptibility
-  High susceptibility
-  Very high susceptibility

0 10 20 km

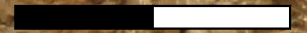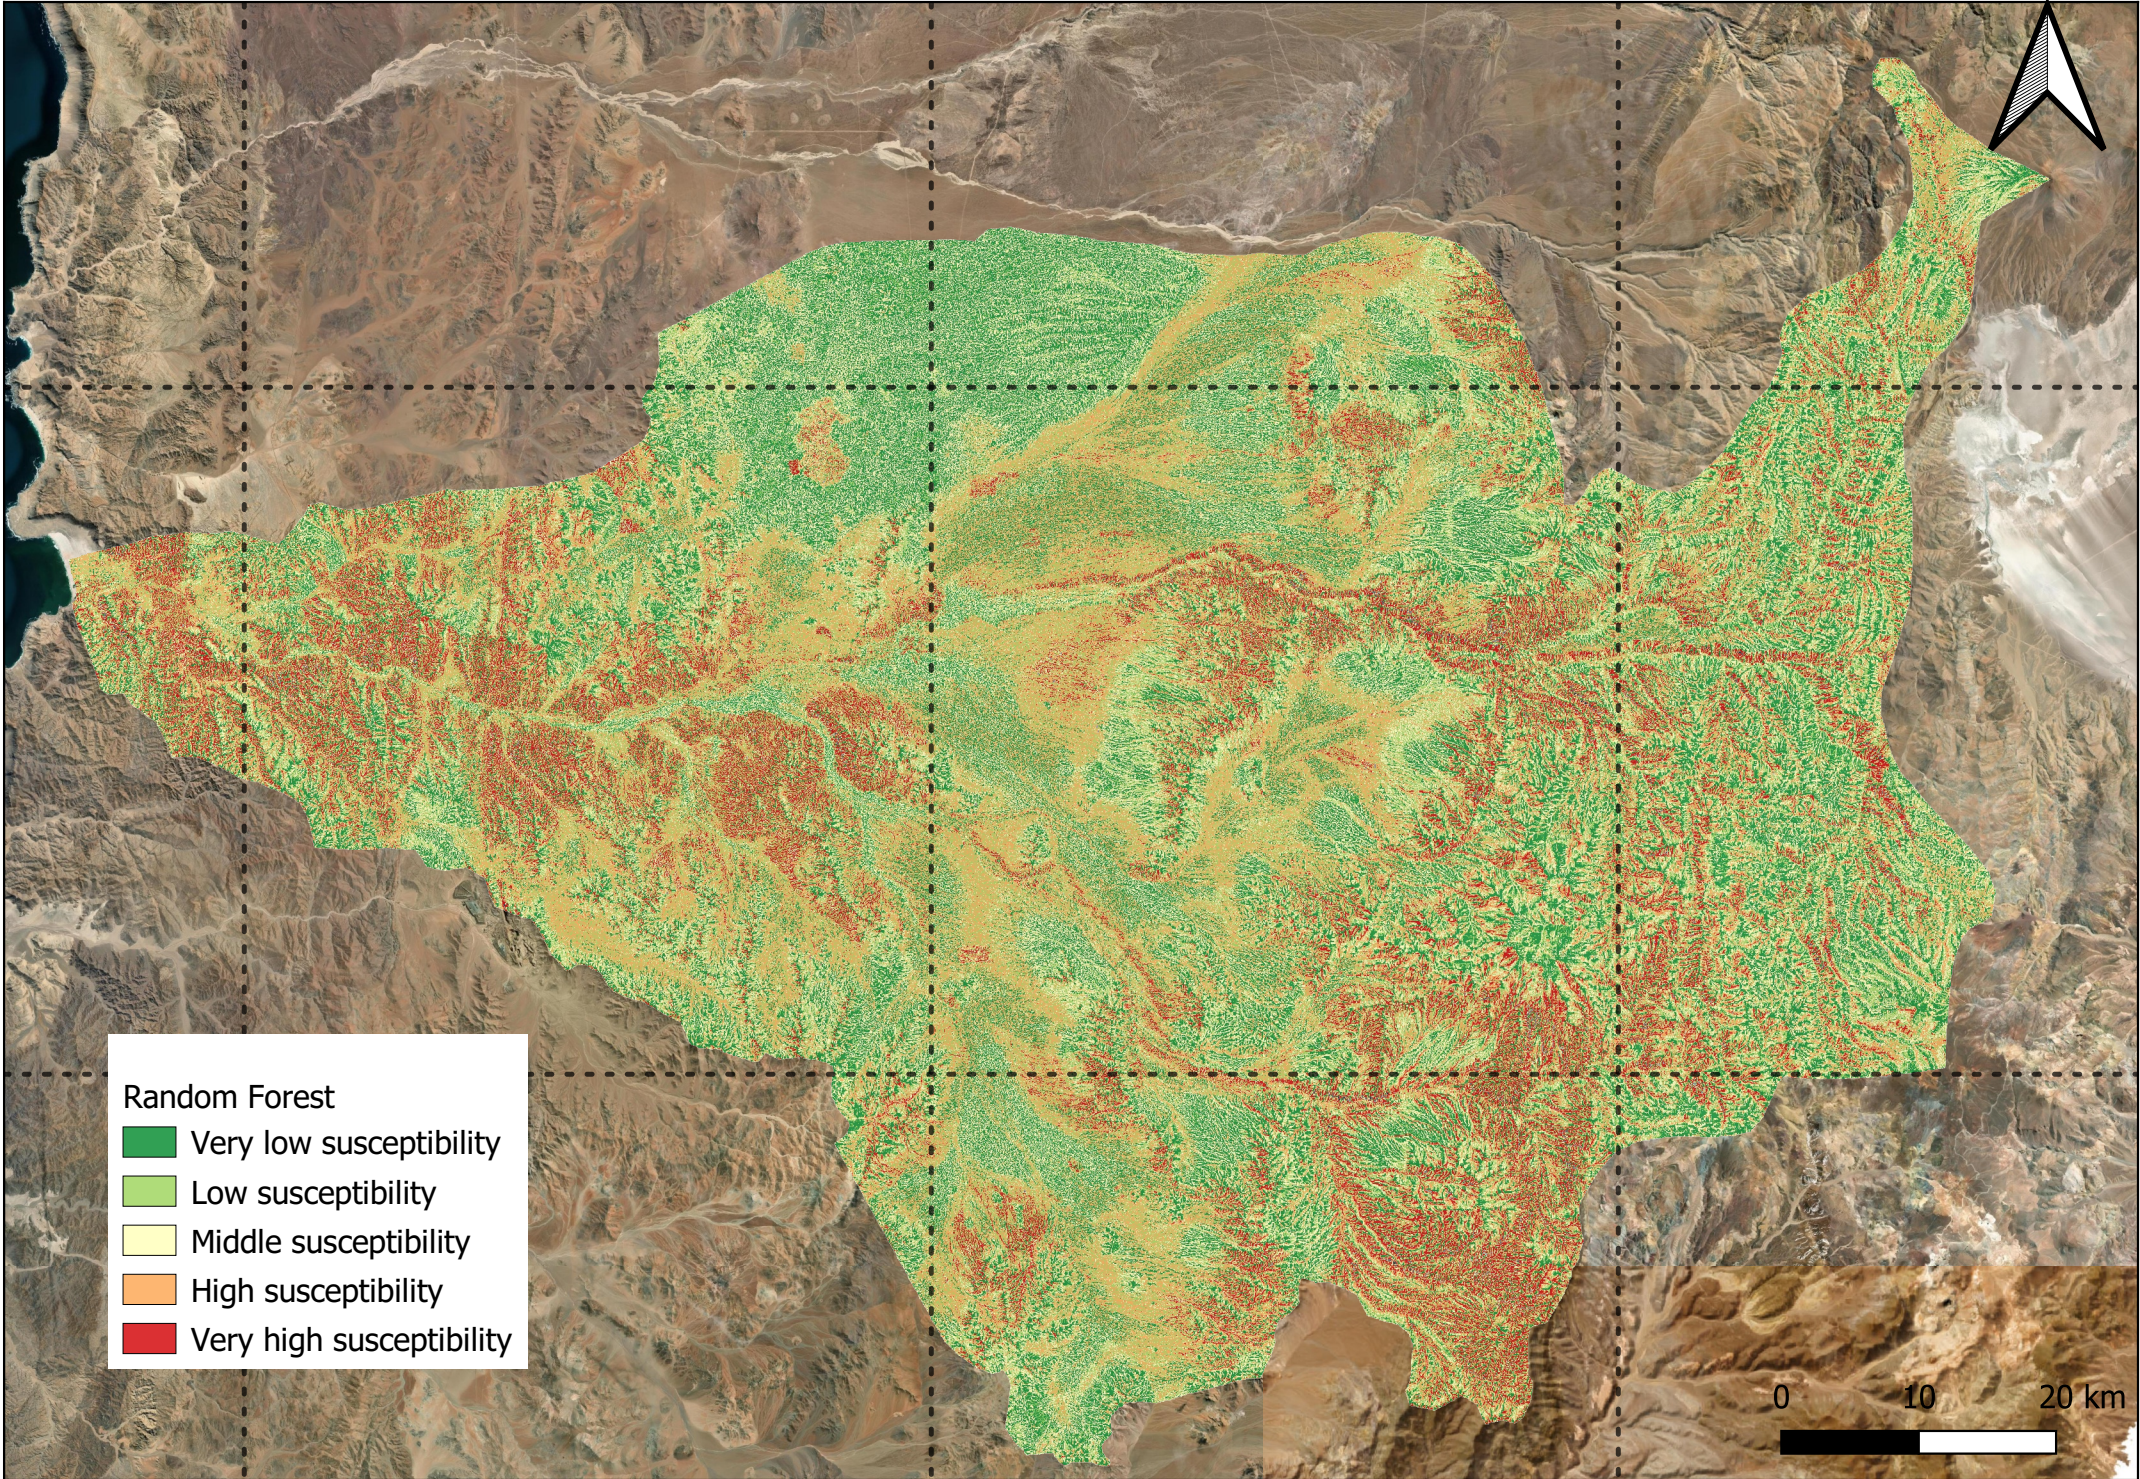

Supplement: Supplementary file [file nhess-2023-72-AC2-supplement.zip]
