# Supplementary material for: Modeling and evaluation of the susceptibility to landslide events using machine learning algorithms in the province of Chañaral, Atacama region, Chile
Source: Copernicus journal article supplement (doi:10.5194/nhess-2023-72), 2023-06-23
Supplement: Supplementary file [file nhess-2023-72-AC6-supplement.zip]

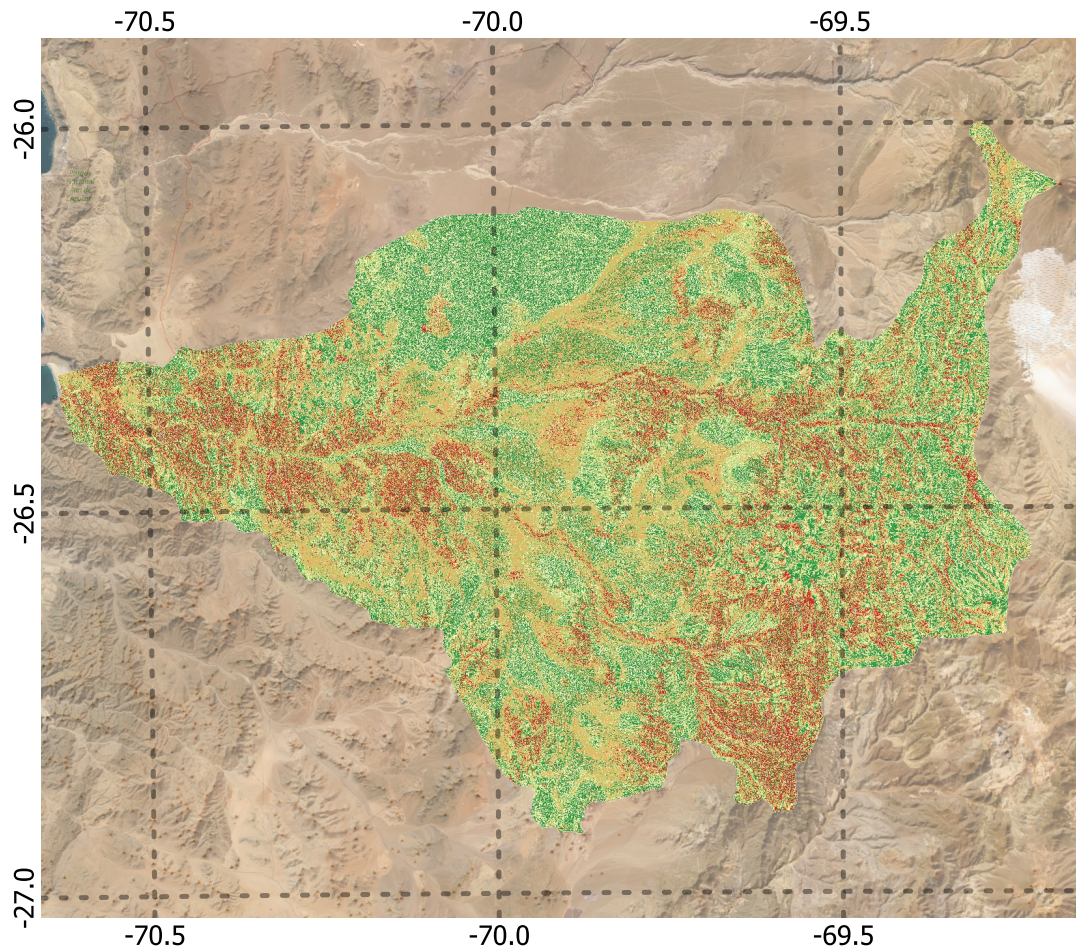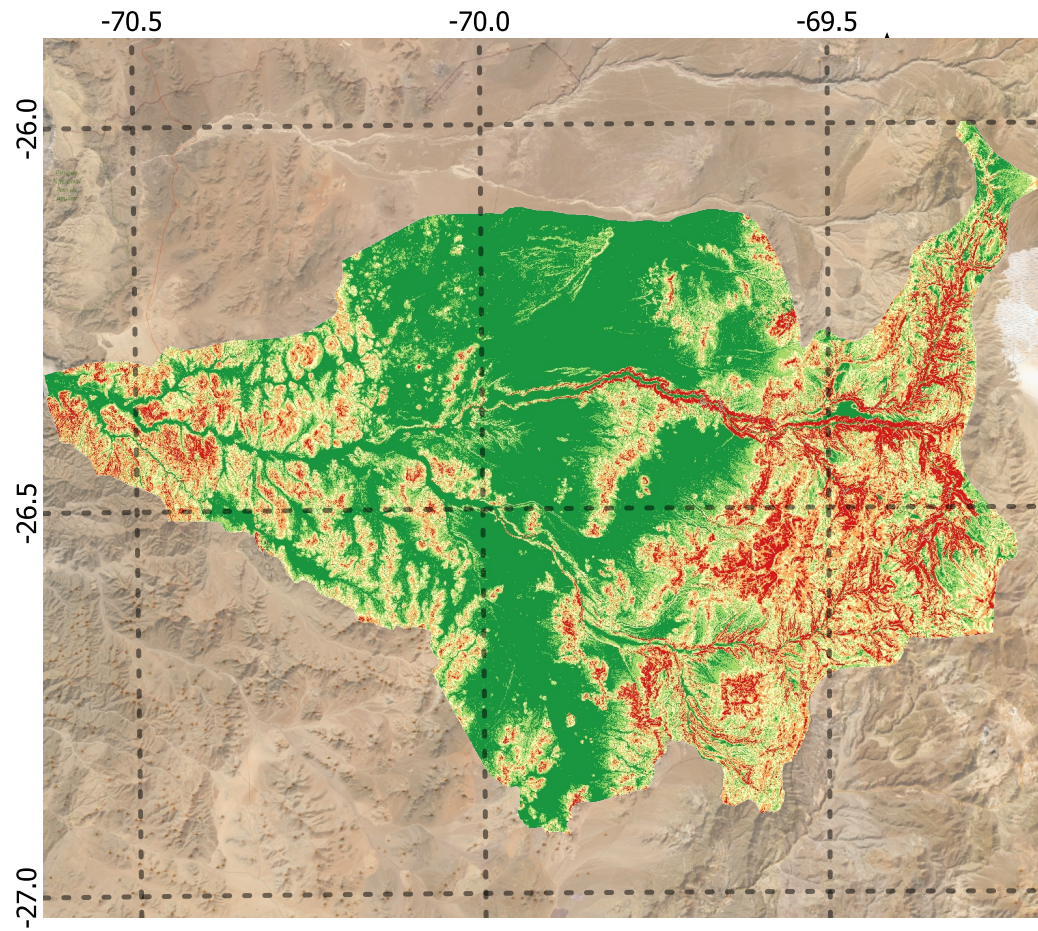

0 10 20 km

### Susceptibility

- Very low susceptibility
- Low susceptibility
- Medium slope
- High slope
- Very high slope

### Slope

- Very low slope
- Low slope
- Medium slope
- High slope
- Very high slope
